# Supplementary material for: Prognostic and therapeutic role of targetable lesions in B-lineage acute lymphoblastic leukemia without recurrent fusion genes
Source: PubMed Central journal article supplement (PMC4924686; doi:10.18632/oncotarget.7356), 2016-02-12

# **Prognostic and therapeutic role of targetable lesions in B-lineage acute lymphoblastic leukemia without recurrent fusion genes**

## **SUPPLEMENTAL MATERIALS AND METHODS**

### **Description of the study population**

Overall, 168 patients (102 patients were males and 66 females, median age: 23 years, range 1.2-78) were included in the present study and were divided in 3 age cohorts. Patients were enrolled in different GIMEMA (Gruppo Italiano Malattie EMatologiche dell'Adulto) and AIEOP (Associazione Italiana Ematologia Oncologia Pediatrica) protocols, designed for adult and pediatric patients, respectively (Table S6). The study was approved by the local IRB and all patients or tutors gave their informed consent to the biological analyses in accordance with the Declaration of Helsinki.

Clinico-biological features of our cohort did not differ from the population enrolled in the above-mentioned protocols, apart from a higher white blood cell (WBC) count ( $p < 0.0001$ ), that, however, did not entail a different overall survival (OS,  $p = 0.56$ ) and disease-free survival (DFS,  $p = 0.62$ ).

### **Sequence mapping and identification of tumor-specific variants of the discovery panel**

Paired-end reads obtained by high-throughput sequencing of the discovery panel were aligned to the human genome reference hg19/NCBI GRCh37 using the BWA alignment tool version 0.5.9. Small sequence variants, i.e. single nucleotide variants and small insertion/deletions (indels), were identified separately for each tumor and germline sample. The allele frequency of each variant was estimated from the number of mutated reads and the total number of reads covering the position of that variant. Using the SAVI algorithm [1], an empirical prior was constructed based on

the data of each sample, from which we obtained a corresponding high-credibility interval (posterior probability  $\geq 99.9\%$ ) for the frequency of each variant and a high-credibility interval for the corresponding change in frequency between the tumor and the normal samples. The non-silent variants, not reported as common dbSNP, with allele frequency  $\geq 20\%$  in tumor and  $\leq 1\%$  in normal, and with significant change in allele frequency between tumor and the normal ( $p < 1e^{-5}$ ), were retained as somatic variants.

#### In silico analysis of the mutated genes

Mutations were mainly missense (94%) and only marginally in-frame (3%) or frameshift deletions (3%). Genes resulted mutated from WES of the discovery and screening panel 1 were assigned to functional categories and pathways by means of DAVID software (<http://david.abcc.ncifcrf.gov/>) and the Molecular Signatures Database (<http://www.broadinstitute.org/gsea/msigdb/index.jsp>) [2, 3]. Also, it was verified whether they were listed in the Catalogue of Somatic Mutations in the Cancer database and in the Cancer Gene Census database (<http://www.sanger.ac.uk/genetics/CGP/Census/>) [4].

Lastly, confirmed, somatic non-silent mutations were tested for their consequences by the PolyPhen-2 algorithm (<http://genetics.bwh.harvard.edu/pph2/>) [5].

#### Sequence mapping and identification of tumor-specific variants of the screening panel 1

Similar to the analysis in the discovery panel, pair-end reads from WES of the screening panel 1 were aligned to hg19 by BWA. High confident SNVs and small indels were then selected by SAVI algorithm. Due to lack of normal control, more stringent criteria were required to eliminate sequencing artifacts and genetic polymorphisms. Only the non-silent variants, not reported as

common dbSNP and in large collection of normal samples from The Cancer Genome Atlas (TCGA), with allele frequency >20% average mapping quality >30, and with at least 2 reads in both forward and backward strands were kept for further study. Based on selected variants, we further integrated the information from the Catalog of somatic mutations (COSMIC), the gene length, and recurrence in different cohorts to identify potential driver genes.

#### Validation of candidate somatic mutations by Sanger sequencing

The sequences surrounding the genomic locations of the candidate tumor-specific non-silent mutations were obtained from the UCSC Human Genome database (<http://genome.ucsc.edu/>), and PCR primers were derived from previously published studies [6] or were custom-designed using the Primer 3 online software (<http://frodo.wi.mit.edu/primer3/>) and the *in silico* PCR tool of the UCSC Human Genome database to verify the uniqueness of the match. Primers sequences are available upon request.

#### Screening of recurrently mutated genes by Sanger sequencing

The coding exons and splice sites of *FLT3*, *KRAS*, *NRAS*, *JAK2* (exons 20, 21) and *JAK1* (exons 14-21) were analyzed by PCR amplification and Sanger sequencing of the whole-genome-amplified DNA generated by the Repli-g Mini kit (Qiagen, Hilden, Germany). PCR primers were designed as described above and available upon request. Sequence analysis was performed by using the Mutation Surveyor Version 3.97 software (SoftGenetics, State College, PA) and, after subtracting synonymous mutations and SNPs, the remaining candidate somatic mutations were confirmed on high-molecular-weight genomic DNA from both tumor and normal (when available) samples by performing PCR amplification and bidirectional direct sequencing.

### Screening of recurrently mutated genes by NGS

Hotspot mutations targeting *PAX5*, *JAK2*, *IL7R*, *CRLF2* were screened by using the Genome Sequencer Junior 454 (Roche Applied Science®) and specific primers and MIDs (Table S9).

Raw images and internal control analysis of each run were performed using settings of the GS Run Browser Software version 2.3 (Roche Applied Science®). A cut-off of 80 reads in forward and in reverse (combined n=160 reads/amplicon/sample) was established as pass filter for subsequent variants analysis. The Sequence Pilot software version 3.4.0 (JSI Medical System, Kippenheim, Germany) was used for sequence analyses and variants detection. Mutations within introns, synonymous mutations and SNPs were filtered out. The mutational load was expressed as mutated allele frequency (MAF) based on the percentage of mutated reads. Only variants above 2% both in forward and in reverse reads were retained.

### Screening of recurrently deleted genes

The copy number status of the genes commonly deleted (i.e. *IKZF1*, *CDKN2A/2B*, *PAX5*, *EBF1*, *ETV6*, *BTG1*) in B-ALL was assessed by multiplex ligation-dependent probe amplification (MLPA) on 157/168 samples, belonging to the screening panels 1 and 2, using the Salsa MLPA P335-A3 ALL-*IKZF1* kit (MRC-Holland, Amsterdam, the Netherlands) and manufacturers' recommendations. Genomic DNA from at least 3 healthy donors per experiment was used as wild-type (WT) control. Data analysis was performed by Coffalyser.Net software ([www.coffalyser.net](http://www.coffalyser.net)) and in agreement with previously published papers [7].



## **SUPPLEMENTAL RESULTS**

### ***In silico* analyses of the mutated genes**

*In silico* analyses showed that all the genes affected by mutations were mentioned in COSMIC and 11 (*ARID1A*, *FGFR3*, *FLT3*, *KRAS*, *NF1*, *NFKB2*, *PAX5*, *PDGFRB*, *PHOX2B*, *SETD2*, *SS18L1*) were also listed in the Cancer Gene Census database as being involved in oncogenesis, thus suggesting a role also in the pathogenesis of B-ALL. Interestingly, when a functional annotation analysis was run by DAVID software, we found a significant enrichment of genes belonging the following categories: Focal adhesion/ECM interaction, Small GTPase mediated signal transduction, Ion transport and Protein kinase activity (Table S2).

## **REFERENCES**

1. Trifonov V, Pasqualucci L, Tiacci E, Falini B, Rabadan R. SAVI: a statistical algorithm for variant frequency identification. *BMC Syst Biol.* 2013; 7 Suppl 2: S2.
2. Huang da W, Sherman BT, Lempicki RA. Systematic and integrative analysis of large gene lists using DAVID bioinformatics resources. *Nat Protoc.* 2009; 4(1): 44-57.
3. Subramanian A, Tamayo P, Mootha VK, Mukherjee S, Ebert BL, Gillette MA, Paulovich A, Pomeroy SL, Golub TR, Lander ES, Mesirov JP. Gene set enrichment analysis: a knowledge-based approach for interpreting genome-wide expression profiles. *Proc Natl Acad Sci U S A.* 2005; 102(43): 15545-50.
4. Forbes SA, Bindal N, Bamford S, Cole C, Kok CY, Beare D, Jia M, Shepherd R, Leung K, Menzies A, Teague JW, Campbell PJ, Stratton MR, Futreal PA. COSMIC: mining complete cancer genomes in the Catalogue of Somatic Mutations in Cancer. *Nucleic Acids Res.* 2011; 39 (Database issue): D945-50.
5. Adzhubei IA, Schmidt S, Peshkin L, Ramensky VE, Gerasimova A, Bork P, Kondrashov AS, Sunyaev SR. A method and server for predicting damaging missense mutations. *Nat Methods.* 2010; 7(4): 248-9.
6. Parsons DW, Li M, Zhang X, Jones S, Leary RJ, Lin JC, Boca SM, Carter H, Samayoa J, Bettegowda C, Gallia GL, Jallo GI, Binder ZA, et al . The genetic landscape of the childhood cancer medulloblastoma. *Science.* 2011; 331(6016): 435-9.
7. Palmi C, Lana T, Silvestri D, Savino A, Kronnie GT, Conter V, Basso G, Biondi A, Valsecchi MG, Cazzaniga G. Impact of IKZF1 deletions on IKZF1 expression and outcome in Philadelphia chromosome negative childhood BCP-ALL. Reply to "incidence and biological significance of IKZF1/Ikaros gene deletions in pediatric Philadelphia chromosome negative and Philadelphia chromosome positive B-cell precursor acute lymphoblastic leukemia". *Haematologica.* 2013; 98(12): e164-5.

**Table S1.** Somatic mutations identified by WES in the B-NEG ALL discovery panel.

| Sample ID | Gene     | CCDS ID                                   | Exon <sup>A</sup> | Chr | Start <sup>AA</sup> | End <sup>AA</sup> | Ref nt              | Var nt       | T frequency | Mutation Type        | AA change                                                         | PolyPhen-2 (score) |
|-----------|----------|-------------------------------------------|-------------------|-----|---------------------|-------------------|---------------------|--------------|-------------|----------------------|-------------------------------------------------------------------|--------------------|
| ALL-1     | AKAP8    | CCDS12329.1                               | 5                 | 19  | 15484077            | 15484077          | C                   | G            | 23          | Missense             | S149T                                                             | po D (0.534)       |
| ALL-1     | APOBEC3B | CCDS13982.1                               | 2                 | 22  | 39380212            | 39380212          | G                   | A            | 55          | Nonsense             | W50*                                                              | nd                 |
| ALL-1     | CNTNAP5  | CCDS46401.1                               | 19                | 2   | 125555682           | 125555682         | C                   | T            | 49          | Missense             | A1000V                                                            | pr D (1)           |
| ALL-1     | EXPH5    | CCDS8341.1                                | 6                 | 11  | 108382098           | 108382098         | G                   | A            | 45          | Missense             | S1379L                                                            | B (0.054)          |
| ALL-1     | FGFR3    | CCDS3353.1                                | 8                 | 4   | 1806233             | 1806233           | C                   | T            | 45          | Missense             | P418S                                                             | pr D (1)           |
| ALL-1     | G6PC     | CCDS11446.1                               | 5                 | 17  | 41063352            | 41063352          | G                   | A            | 42          | Missense             | C328Y                                                             | pr D (1)           |
| ALL-1     | GABRA5   | CCDS45194.1                               | 3                 | 15  | 27128367            | 27128367          | C                   | T            | 45          | Missense             | S88F                                                              | pr D (1)           |
| ALL-1     | LGR5     | CCDS9000.1                                | 15                | 12  | 71972615            | 71972615          | C                   | T            | 61          | Missense             | P438S                                                             | pr D (1)           |
| ALL-1     | LPNH2    | CCDS689.1                                 | 10                | 1   | 82432183            | 82432183          | C                   | T            | 53          | Missense             | R730C                                                             | pr D (0.998)       |
| ALL-1     | MAP1B    | CCDS4012.1                                | 5                 | 5   | 71496087            | 71496087          | C                   | T            | 43          | Missense             | P2302L                                                            | B (0.002)          |
| ALL-1     | MDN1     | CCDS5024.1                                | 60                | 6   | 90406289            | 90406289          | G                   | A            | 25          | Missense             | P3058L                                                            | pr D (0.998)       |
| ALL-1     | MVD      | CCDS10968.1                               | 5                 | 16  | 88722658            | 88722658          | C                   | G            | 31          | Missense             | R153P                                                             | pr D (1)           |
| ALL-1     | MYH13    | CCDS45613.1                               | 36                | 17  | 10206803            | 10206803          | C                   | T            | 40          | Missense             | E1827K                                                            | pr D (1)           |
| ALL-1     | MYO6     | CCDS34487.1                               | 33                | 6   | 76623969            | 76623969          | C                   | T            | 27          | Missense             | P1210L                                                            | pr D (1)           |
| ALL-1     | NFKB2    | CCDS41564.1                               | 8                 | 10  | 104157768           | 104157768         | C                   | T            | 31          | Missense             | S231F                                                             | pr D (1)           |
| ALL-1     | PTRF     | CCDS11425.1                               | 2                 | 17  | 40557056            | 40557056          | C                   | T            | 37          | Missense             | M274I                                                             | B (0.005)          |
| ALL-1     | SLC5A12  | CCDS7860.2                                | 5                 | 11  | 26725413            | 26725413          | C                   | T            | 59          | Missense             | G203R                                                             | pr D (0.998)       |
| ALL-1     | TAAR2    | CCDS5157.1<br>CCDS34541.1                 | 1,2               | 6   | 132938923           | 132938923         | C                   | T            | 23          | Missense             | R96K,R141K                                                        | pr D (1)           |
| ALL-1     | VCAN     | CCDS4060.1<br>CCDS47242.1                 | 14,12             | 5   | 82876248            | 82876248          | C                   | T            | 43          | Missense             | R3396C,R655C                                                      | pr D (1)           |
| ALL-2     | ALDH1A2  | CCDS10163.1<br>CCDS10164.1<br>CCDS45266.1 | 9,8,7             | 15  | 58256129            | 58256129          | C                   | T            | 29          | Missense             | R347H,R309H,<br>R251H                                             | B (0.026)          |
| ALL-2     | ATP5G2   | CCDS31812.1<br>CCDS8863.2                 | 3,3               | 12  | 54063678            | 54063678          | G                   | A            | 32          | Nonsense             | R48*,R89*                                                         | nd                 |
| ALL-2     | CACNA1G  | CCDS45730.1<br>CCDS45733.1<br>CCDS45734.1 | 27,26,25          | 17  | 48692787            | 48692787          | A                   | C            | 20          | Missense             | T1609P, T1591P,<br>T1575P                                         | pr D (1)           |
| ALL-2     | CADM2    | CCDS33792.1                               | 7                 | 3   | 86010650            | 86010650          | G                   | A            | 35          | Missense             | G268R                                                             | pr D (0.998)       |
| ALL-2     | DCAF5    | CCDS32106.1                               | 9                 | 14  | 69520902            | 69520904          | TTG                 | -            | 29          | In frame deletion    | N833- N834-                                                       | nd                 |
| ALL-2     | HOXA6    | CCDS5407.1                                | 2                 | 7   | 27185428            | 27185428          | C                   | T            | 28          | Missense             | R184H                                                             | pr D (0.999)       |
| ALL-2     | KLF5     | CCDS9448.1                                | 4                 | 13  | 73649980            | 73649980          | C                   | T            | 25          | Missense             | R444C                                                             | pr D (0.983)       |
| ALL-2     | NPHS1    | CCDS32996.1                               | 21                | 19  | 36330506            | 36330506          | C                   | T            | 27          | Missense             | R940H                                                             | po D (0.517)       |
| ALL-2     | SLC24A5  | CCDS10128.1                               | 3                 | 15  | 48426500            | 48426500          | C                   | T            | 24          | Missense             | A116V                                                             | B (0.036)          |
| ALL-2     | VWDE     | CCDS47544.1                               | 12                | 7   | 12409638            | 12409638          | G                   | A            | 30          | Missense             | P765L                                                             | B (0)              |
| ALL-3     | ANO5     | CCDS31444.1                               | 21                | 11  | 22297675            | 22297675          | A                   | G            | 22          | Missense             | N817S                                                             | B (0.009)          |
| ALL-3     | C8orf84  | CCDS43747.2                               | 2                 | 8   | 73993367            | 73993367          | C                   | T            | 25          | Missense             | R99H                                                              | pr D (1)           |
| ALL-3     | COL11A1  | CCDS778.1<br>CCDS780.1                    | 40,39             | 1   | 103427739           | 103427739         | C                   | A            | 32          | Missense             | G1036V,G997V                                                      | pr D (1)           |
| ALL-3     | EIF2S3   | CCDS14210.1                               | 2                 | X   | 24073777            | 24073777          | C                   | A            | 37          | Missense             | Q39K                                                              | pr D (1)           |
| ALL-3     | IRF2BP1  | CCDS12678.1                               | 1                 | 19  | 46387778            | 46387778          | C                   | A            | 31          | Missense             | V419L                                                             | B (0.005)          |
| ALL-3     | LILRA2   | CCDS46179.1                               | 5                 | 19  | 55086996            | 55086996          | A                   | G            | 31          | Missense             | D310G                                                             | pr D (0.998)       |
| ALL-3     | MBTPS1   | CCDS10941.1                               | 1                 | 16  | 84135288            | 84135288          | G                   | A            | 41          | Missense             | P34L                                                              | B (0)              |
| ALL-3     | OR4D6    | CCDS31562.1                               | 1                 | 11  | 59225212            | 59225212          | G                   | A            | 31          | Missense             | R260Q                                                             | po D (0.94)        |
| ALL-3     | ZNF217   | CCDS13443.1                               | 1                 | 20  | 52198585            | 52198599          | TCCTGCCGTAA<br>GGAG | CCGCTCT<br>T | 33          | Frameshift indel     | G256- G257-<br>M258- P259-<br>S260- S261-<br>C259+ R260+<br>A261+ | nd                 |
| ALL-4     | C17orf71 | CCDS11615.1                               | 3                 | 17  | 57290400            | 57290400          | G                   | A            | 59          | Missense             | R739Q                                                             | pr D (0.991)       |
| ALL-4     | CT47B1   | CCDS48161.1                               | 1                 | X   | 120009185           | 120009185         | G                   | A            | 30          | Missense             | R114W                                                             | pr D (0.996)       |
| ALL-4     | DNAH10   | CCDS9255.2                                | 69                | 12  | 124413087           | 124413087         | G                   | A            | 33          | Missense             | D3969N                                                            | B (0.314)          |
| ALL-4     | FLT3     | CCDS31953.1                               | 20                | 13  | 28592635            | 28592637          | ATG                 | -            | 51          | In frame deletion    | I836, M837-                                                       | nd                 |
| ALL-4     | KIAA1755 | CCDS33467.1                               | 4                 | 20  | 36867930            | 36867930          | C                   | A            | 28          | Missense             | G583C                                                             | pr D (1)           |
| ALL-4     | NYNRIN   | CCDS45090.1                               | 8                 | 14  | 24884755            | 24884755          | A                   | G            | 24          | Missense             | K1267R                                                            | B (0.218)          |
| ALL-4     | PHOX2B   | CCDS3463.1                                | 3                 | 4   | 41747843            | 41747843          | A                   | C            | 50          | Missense             | V309G                                                             | pr D (0.998)       |
| ALL-4     | SLC25A46 | CCDS4100.1                                | 8                 | 5   | 110097399           | 110097399         | G                   | A            | 42          | Missense             | V392I                                                             | B (0.027)          |
| ALL-5     | CCDC78   | CCDS32353.1                               | 8                 | 16  | 774802              | 774802            | A                   | G            | 29          | Missense             | L215P                                                             | pr D (1)           |
| ALL-5     | FRG2B    | CCDS44502.1                               | 4                 | 10  | 135438836           | 135438836         | G                   | T            | 20          | Missense             | L202I                                                             | pr D (0.986)       |
| ALL-5     | GNRH2    | CCDS13040.1<br>CCDS13041.1<br>CCDS13042.1 | 3,3,3             | 20  | 3026345             | 3026345           | -                   | GCCCC        | 25          | Frameshift insertion | E109+,E102+,<br>E101+                                             | nd                 |
| ALL-5     | ITGA11   | CCDS45291.1                               | 13                | 15  | 68624762            | 68624762          | C                   | T            | 48          | Missense             | V494M                                                             | B (0.007)          |
| ALL-5     | NHLH2    | CCDS885.1                                 | 1                 | 1   | 116380950           | 116380950         | C                   | A            | 33          | Missense             | S15I                                                              | pr D (0.984)       |
| ALL-5     | OR8B8    | CCDS8446.1                                | 1                 | 11  | 124310957           | 124310957         | C                   | T            | 52          | Missense             | V9M                                                               | B (0.088)          |
| ALL-5     | PLXNA3   | CCDS14752.1                               | 17                | X   | 153695461           | 153695461         | C                   | T            | 23          | Missense             | R1057C                                                            | pr D (1)           |
| ALL-5     | TADA2B   | CCDS47007.1                               | 2                 | 4   | 7056213             | 7056213           | T                   | A            | 27          | Missense             | F232Y                                                             | po D (0.911)       |



|        |                               |                            |       |    |           |           |       |     |     |                     |                                           |              |
|--------|-------------------------------|----------------------------|-------|----|-----------|-----------|-------|-----|-----|---------------------|-------------------------------------------|--------------|
| ALL-5  | TADA2B                        | CCDS47007.1                | 2     | 4  | 7056216   | 7056216   | -     | CCA | 21  | In frame insertion  | Q234+                                     | nd           |
| ALL-5  | TCERG1                        | CCDS4282.1<br>CCDS43379.1  | 8,7   | 5  | 145850206 | 145850210 | AGAAG | -   | 52  | Frameshift deletion | L469-, E470,<br>E471/L448-,<br>E449, E450 | nd           |
| ALL-6  | BAI3                          | CCDS4968.1                 | 28    | 6  | 70082310  | 70082310  | C     | T   | 24  | Nonsense            | R1418*                                    | nd           |
| ALL-6  | FAM167A                       | CCDS5981.1                 | 1     | 8  | 11301796  | 11301796  | C     | T   | 25  | Missense            | R42H                                      | pr D (1)     |
| ALL-6  | GPR83                         | CCDS8297.1                 | 4     | 11 | 94113673  | 94113673  | C     | A   | 33  | Missense            | W305L                                     | pr D (1)     |
| ALL-6  | IL1RAPL1                      | CCDS14218.1                | 10    | X  | 29973626  | 29973626  | G     | A   | 46  | Missense            | A594T                                     | B (0.002)    |
| ALL-6  | RASGRP2                       | CCDS31598.1                | 8     | 11 | 64504274  | 64504274  | C     | A   | 36  | Missense            | S349I                                     | B (0.052)    |
| ALL-6  | SS18L1                        | CCDS13491.1                | 6     | 20 | 60738592  | 60738592  | C     | T   | 27  | Missense            | S212L                                     | po D (0.465) |
| ALL-6  | ZDHHC14                       | CCDS5252.1<br>CCDS47510.1  | 3,3   | 6  | 158014145 | 158014145 | G     | A   | 23  | Missense            | A178T,A178T                               | po D (0.865) |
| ALL-7  | ABCC2                         | CCDS7484.1                 | 2     | 10 | 101544387 | 101544387 | C     | T   | 43  | Missense            | P19L                                      | po D (0.839) |
| ALL-7  | AGTR1                         | CCDS3137.1                 | 1     | 3  | 148459240 | 148459240 | C     | T   | 53  | Missense            | R140C                                     | pr D (1)     |
| ALL-7  | AP2A1                         | CCDS46148.1<br>CCDS46149.1 | 23,22 | 19 | 50309488  | 50309488  | T     | A   | 31  | Missense            | L945Q,L923Q                               | pr D (1)     |
| ALL-7  | COL6A1                        | CCDS13727.1                | 31    | 21 | 47421948  | 47421948  | G     | A   | 100 | Missense            | R677H                                     | B (0.021)    |
| ALL-7  | COL6A1                        | CCDS13727.1                | 35    | 21 | 47423817  | 47423817  | G     | A   | 90  | Missense            | E993K                                     | po D (0.919) |
| ALL-7  | DCHS2                         | CCDS3785.1                 | 25    | 4  | 155156598 | 155156598 | G     | A   | 49  | Missense            | P2614L                                    | B (0.071)    |
| ALL-7  | EPHA5                         | CCDS3513.1<br>CCDS3514.1   | 11,10 | 4  | 66231734  | 66231734  | A     | G   | 48  | Missense            | Y656H,Y634H                               | pr D (1)     |
| ALL-7  | FBN2                          | CCDS34222.1                | 30    | 5  | 127670915 | 127670915 | C     | T   | 49  | Missense            | R1307H                                    | B (0.027)    |
| ALL-7  | GTF2A1L,<br>STON1-<br>GTF2A1L | CCDS46281.1<br>CCDS1840.1  | 3,4   | 2  | 48848310  | 48848310  | G     | T   | 46  | Missense            | W43L,W747L                                | pr D (1)     |
| ALL-7  | HLA-B                         | CCDS34394.1                | 3     | 6  | 31324195  | 31324195  | T     | A   | 42  | Missense            | Y123F                                     | B (0.004)    |
| ALL-7  | ITGA5                         | CCDS8880.1                 | 27    | 12 | 54793500  | 54793500  | C     | G   | 40  | Missense            | G924R                                     | pr D (1)     |
| ALL-7  | LRRC30                        | CCDS42409.1                | 1     | 18 | 7231198   | 7231198   | C     | T   | 47  | Missense            | T21M                                      | B (0.071)    |
| ALL-7  | SH3GLB2                       | CCDS6916.1                 | 10    | 9  | 131771419 | 131771419 | G     | A   | 57  | Missense            | A349V                                     | po D (0.875) |
| ALL-7  | TRPC7                         | CCDS47267.1                | 5     | 5  | 135587487 | 135587487 | C     | T   | 45  | Missense            | G477R                                     | po D (0.924) |
| ALL-8  | ANKRD20A<br>2                 | CCDS35028.1                | 15    | 9  | 42409857  | 42409857  | G     | T   | 31  | Missense            | A616S                                     | pr D (0.989) |
| ALL-8  | ANKRD30A                      | CCDS7193.1                 | 7     | 10 | 37430979  | 37430979  | G     | T   | 42  | Missense            | W329L                                     | po D (0.659) |
| ALL-8  | COL1A2                        | CCDS34682.1                | 49    | 7  | 94057162  | 94057162  | G     | A   | 51  | Missense            | R1164H                                    | pr D (1)     |
| ALL-8  | DRG2                          | CCDS11191.1                | 5     | 17 | 18003009  | 18003009  | C     | A   | 33  | Missense            | L147M                                     | pr D (1)     |
| ALL-8  | FLT3                          | CCDS31953.1                | 20    | 13 | 28592621  | 28592621  | A     | T   | 72  | Missense            | Y842N                                     | pr D (1)     |
| ALL-8  | GTDC1                         | CCDS2185.1                 | 1     | 2  | 144966273 | 144966273 | C     | A   | 43  | Nonsense            | G26*                                      | nd           |
| ALL-8  | LONRF2                        | CCDS2046.2                 | 2     | 2  | 100925658 | 100925658 | G     | A   | 40  | Missense            | R237W                                     | pr D (1)     |
| ALL-8  | PCDHA11                       | CCDS47284.1                | 1     | 5  | 140249854 | 140249854 | C     | T   | 29  | Missense            | T389M                                     | po D (0.83)  |
| ALL-8  | PREX2                         | CCDS6201.1                 | 6     | 8  | 68942753  | 68942753  | C     | T   | 54  | Missense            | R189W                                     | po D (0.912) |
| ALL-8  | SETD2                         | CCDS2749.2                 | 5     | 3  | 47155366  | 47155366  | G     | C   | 49  | Missense            | S1572W                                    | pr D (0.999) |
| ALL-8  | TBC1D21                       | CCDS10252.1                | 8     | 15 | 74178904  | 74178904  | G     | A   | 71  | Missense            | C243Y                                     | B (0.101)    |
| ALL-8  | USP32                         | CCDS32697.1                | 21    | 17 | 58288396  | 58288396  | T     | C   | 29  | Missense            | N801S                                     | B (0.011)    |
| ALL-8  | WWC1                          | CCDS4366.1                 | 11    | 5  | 167850581 | 167850581 | G     | A   | 23  | Missense            | G440R                                     | pr D (1)     |
| ALL-8  | ZNF250                        | CCDS34972.1                | 5     | 8  | 146106958 | 146106958 | C     | T   | 52  | Missense            | R542H                                     | pr D (0.989) |
| ALL-9  | CSNK1E                        | CCDS13970.1                | 4     | 22 | 38696791  | 38696791  | C     | T   | 45  | Missense            | R168Q                                     | pr D (1)     |
| ALL-9  | GCNT4                         | CCDS4026.1                 | 1     | 5  | 74325046  | 74325046  | G     | A   | 28  | Missense            | R273W                                     | po D (0.946) |
| ALL-9  | GRIN2B                        | CCDS8662.1                 | 6     | 12 | 13768155  | 13768155  | T     | A   | 37  | Missense            | N516I                                     | po D (0.952) |
| ALL-9  | NF1                           | CCDS42292.1                | 12    | 17 | 29533315  | 29533315  | C     | T   | 47  | Nonsense            | R440*                                     | nd           |
| ALL-9  | NF1                           | CCDS42292.1<br>CCDS11264.1 | 32,31 | 17 | 29585494  | 29585494  | G     | A   | 51  | Missense            | E1436K,E1415K                             | B (0.024)    |
| ALL-9  | PAPSS1                        | CCDS3676.1                 | 8     | 4  | 108575880 | 108575880 | T     | C   | 40  | Missense            | T358A                                     | po D (0.935) |
| ALL-10 | ADAMTSL2                      | CCDS6976.1                 | 2     | 9  | 136402527 | 136402527 | G     | T   | 23  | Missense            | D31Y                                      | pr D (0.997) |
| ALL-10 | ANKRD17                       | CCDS34003.1                | 1     | 4  | 74124123  | 74124123  | C     | G   | 22  | Missense            | S88T                                      | B (0.14)     |
| ALL-10 | ARRB2                         | CCDS11050.1<br>CCDS11051.1 | 7,6   | 17 | 4620986   | 4620986   | G     | T   | 25  | Missense            | G142C,G127C                               | pr D (1)     |
| ALL-10 | IRS4                          | CCDS14544.1                | 1     | X  | 107977758 | 107977758 | C     | T   | 26  | Missense            | R606H                                     | B (0.018)    |
| ALL-10 | PAX5                          | CCDS6607.1                 | 3     | 9  | 37015165  | 37015165  | G     | C   | 24  | Missense            | P80R                                      | pr D (0.999) |
| ALL-10 | PRSS23                        | CCDS8278.1                 | 1     | 11 | 86519206  | 86519206  | C     | T   | 28  | Missense            | A174V                                     | pr D (1)     |
| ALL-10 | RASSF1                        | CCDS43096.1<br>CCDS2820.1  | 2,2   | 3  | 50375431  | 50375431  | T     | G   | 36  | Missense            | T88P,T92P                                 | po D (0.904) |
| ALL-10 | SLC26A3                       | CCDS5748.1                 | 12    | 7  | 107418675 | 107418675 | C     | A   | 22  | Missense            | G487C                                     | pr D (1)     |
| ALL-10 | TTC39B                        | CCDS6477.1                 | 3     | 9  | 15225928  | 15225928  | A     | G   | 42  | Missense            | S54P                                      | B (0)        |
| ALL-10 | USH1C                         | CCDS7825.1                 | 5     | 11 | 17548863  | 17548863  | C     | T   | 33  | Missense            | V135I                                     | pr D (1)     |
| ALL-10 | WASF3                         | CCDS9318.1                 | 6     | 13 | 27255387  | 27255387  | C     | -   | 39  | Frameshift deletion | P305-                                     | nd           |
| ALL-11 | AOC2                          | CCDS45690.1                | 2     | 17 | 41001306  | 41001306  | G     | A   | 31  | Missense            | G598R                                     | pr D (1)     |
| ALL-11 | ARID1A                        | CCDS44091.1<br>CCDS285.1   | 20,20 | 1  | 27105553  | 27105553  | C     | T   | 30  | Nonsense            | R1505*,R1722*                             | nd           |
| ALL-11 | CCNE2                         | CCDS6264.1                 | 2     | 8  | 95906312  | 95906312  | C     | G   | 40  | Missense            | S17T                                      | B (0.018)    |
| ALL-11 | CCNL1                         | CCDS3178.1                 | 5     | 3  | 156869993 | 156869993 | C     | T   | 41  | Missense            | R216H                                     | pr D (0.98)  |
| ALL-11 | CNGB1                         | CCDS42169.1                | 31    | 16 | 57921836  | 57921836  | G     | C   | 47  | Missense            | L1129V                                    | pr D (0.993) |
| ALL-11 | ETV7                          | CCDS4819.1                 | 5     | 6  | 36339257  | 36339257  | C     | A   | 33  | Missense            | G172C                                     | pr D (0.957) |
| ALL-11 | GAST                          | CCDS11404.1                | 1     | 17 | 39871735  | 39871735  | C     | T   | 50  | Missense            | A16V                                      | pr D (0.999) |
| ALL-11 | HLA-DRB1                      | CCDS47409.1                | 2     | 6  | 32551912  | 32551912  | A     | C   | 50  | Missense            | V115G                                     | B (0.001)    |

|        |          |                                        |          |    |           |           |   |   |    |          |                           |              |
|--------|----------|----------------------------------------|----------|----|-----------|-----------|---|---|----|----------|---------------------------|--------------|
| ALL-11 | LRRC28   | CCDS10380.1                            | 4        | 15 | 99828121  | 99828121  | G | A | 22 | Missense | R117Q                     | pr D (0.991) |
| ALL-11 | PPP2R2C  | CCDS3387.1                             | 7        | 4  | 6335353   | 6335353   | C | T | 36 | Missense | R299Q                     | pr D (0.976) |
| ALL-13 | ADAMTS2  | CCDS4444.1                             | 17       | 5  | 178555006 | 178555006 | C | A | 22 | Missense | E857D                     | pr D (0.982) |
| ALL-13 | CAPRIN1  | CCDS31453.1                            | 12       | 11 | 34111803  | 34111803  | A | C | 32 | Missense | Q457H                     | pr D (0.958) |
| ALL-13 | CSMD3    | CCDS6315.1<br>CCDS6316.2<br>CCDS6317.1 | 57,55,57 | 8  | 113301605 | 113301605 | G | T | 40 | Missense | P3046H, P2877H,<br>P3006H | pr D (1)     |
| ALL-13 | HLA-C    | CCDS34393.1                            | 2        | 6  | 31239613  | 31239613  | C | T | 20 | Missense | V36M                      | pr D (1)     |
| ALL-13 | KRAS     | CCDS8702.1                             | 3        | 12 | 25378562  | 25378562  | C | T | 45 | Missense | A146T                     | pr D (0.993) |
| ALL-13 | PAX5     | CCDS6607.1                             | 3        | 9  | 37015165  | 37015165  | G | C | 83 | Missense | P80R                      | pr D (0.999) |
| ALL-13 | SLC1A6   | CCDS12321.1                            | 1        | 19 | 15083563  | 15083563  | G | A | 31 | Missense | R54C                      | B (0.063)    |
| ALL-14 | CDC27    | CCDS45720.1<br>CCDS11509.1             | 11,11    | 17 | 45219676  | 45219676  | C | A | 24 | Missense | D439Y,D433Y               | pr D (0.989) |
| ALL-14 | EGFLAM   | CCDS3924.1<br>CCDS3925.1               | 8,3      | 5  | 38407026  | 38407026  | A | T | 50 | Missense | I309F,I75F                | B (0.002)    |
| ALL-14 | HLA-DRB5 | CCDS4751.1                             | 1        | 6  | 32497968  | 32497968  | T | A | 24 | Missense | M12L                      | po D (0.802) |
| ALL-14 | HLA-DRB5 | CCDS4751.1                             | 1        | 6  | 32497971  | 32497971  | A | T | 25 | Missense | Y11N                      | B (0.027)    |
| ALL-14 | KCTD19   | CCDS42179.1                            | 6        | 16 | 67333416  | 67333416  | C | A | 36 | Missense | S279I                     | B (0.154)    |
| ALL-14 | KIAA1614 | CCDS41442.1                            | 2        | 1  | 180885903 | 180885903 | G | A | 42 | Missense | G222R                     | B (0.004)    |
| ALL-14 | MAST4    | CCDS47225.1                            | 28       | 5  | 66459843  | 66459843  | C | A | 57 | Missense | S1423R                    | B (0.302)    |
| ALL-14 | MUC17    | CCDS34711.1                            | 3        | 7  | 100676948 | 100676948 | A | C | 44 | Missense | S751R                     | po D (0.618) |
| ALL-14 | NPTX2    | CCDS5657.1                             | 4        | 7  | 98256583  | 98256583  | T | C | 47 | Missense | L332P                     | pr D (0.998) |
| ALL-14 | OR1D2    | CCDS11019.1                            | 1        | 17 | 2995888   | 2995888   | C | T | 48 | Missense | A135T                     | B (0.008)    |
| ALL-14 | PCBP4    | CCDS2839.1<br>CCDS2840.1               | 4,1      | 3  | 51994630  | 51994630  | C | T | 41 | Missense | G56D,G22D                 | pr D (1)     |
| ALL-14 | PREX2    | CCDS6201.1                             | 23       | 8  | 69012074  | 69012074  | A | T | 21 | Missense | K904I                     | po D (0.482) |
| ALL-14 | SCG2     | CCDS2457.1                             | 1        | 2  | 224463709 | 224463709 | G | A | 48 | Missense | H98Y                      | B (0.238)    |
| ALL-14 | SSH1     | CCDS9121.1                             | 12       | 12 | 109194580 | 109194580 | G | A | 21 | Missense | A375V                     | po D (0.784) |
| ALL-14 | TNRC6B   | CCDS46713.1                            | 5        | 22 | 40661049  | 40661049  | A | G | 42 | Missense | N272S                     | B (0.009)    |

^In CCDS Reference Sequence

^^Numbering according to the Human Genome hg19 assembly

Abbreviations: T, tumor; N, normal; Ref nt, reference nucleotide; Var nt, variant nucleotide; AA, amino acid; fs, frameshift; D, deletion; nd, not determined (The PolyPhen-2 algorithm predicts only the impact of amino acid substitutions); B, benign; pr D, probably damaging; po D, possibly damaging.

**Table S2.** Enriched functional categories and pathways in discovery panel mutated genes (DAVID analysis).

| <u>All cohorts</u> | <u>Gene category</u>                      | <u>Enrichment score</u> |
|--------------------|-------------------------------------------|-------------------------|
|                    | Extracellular structure organization      | 3.08*                   |
|                    | Plasma membrane                           | 2.97*                   |
|                    | Neurological system process               | 1.87*                   |
|                    | Focal adhesion/ECM interaction            | 1.68*                   |
|                    | MHC protein complex                       | 1.29*                   |
|                    | Small GTPase mediated signal transduction | 1.28*                   |
|                    | Regulation of cell proliferation          | 0.99                    |
|                    | Cell migration                            | 0.91                    |
|                    | Skeletal/Muscle development               | 0.87*                   |
|                    | Ion transport                             | 0.81*                   |
|                    | Cell projection                           | 0.78                    |
|                    | Sensory perception                        | 0.74                    |
|                    | Protein kinase activity                   | 0.72*                   |
| <u>Children</u>    | Regulation of nervous system development  | 0.95                    |
|                    | Embryonic organ development               | 0.95*                   |
|                    | Cell projection organization              | 0.84*                   |
|                    | Ion transport                             | 0.66                    |
|                    | Cell motion                               | 0.61                    |
|                    | Regulation of cell proliferation          | 0.59*                   |
|                    | Transcriptional regulation activity       | 0.54                    |
|                    | Nucleotide binding                        | 0.4                     |
|                    | G-protein coupled receptor activity       | 0.36                    |
| <u>AYA</u>         | Growth factor binding                     | 2*                      |
|                    | Plasma membrane part                      | 2*                      |
|                    | Small GTPase mediated signal transduction | 1.32*                   |
|                    | Extracellular matrix                      | 1.1*                    |
|                    | Cell projection                           | 1.09*                   |
|                    | Regulation of cell proliferation          | 1.05*                   |
|                    | Cell adhesion                             | 0.85                    |
|                    | Protein kinase activity                   | 0.82*                   |
|                    | Ion binding                               | 0.57*                   |
|                    | Ion homeostasis                           | 0.52                    |
| <u>Adults</u>      | MHC/Cell adhesion                         | 2*                      |
|                    | Regulation of apoptosis                   | 0.77                    |
|                    | Neurological system process               | 0.71                    |
|                    | Plasma membrane                           | 0.7                     |
|                    | Cell projection                           | 0.65*                   |
|                    | Transcription regulation                  | 0.21                    |
|                    | Nucleoplasm                               | 0.16                    |
|                    | Ion binding                               | 0.12                    |

\*Significant *p*-value.

**Table S3.** Validated mutations targeting recurrently mutated driver genes detected in the discovery and screening panel 1.

| <b>Gene</b>   | <b>Total cases (81)</b> | <b>Children (15)</b> | <b>AYA (32)</b> | <b>Adults (34)</b> |
|---------------|-------------------------|----------------------|-----------------|--------------------|
| <i>PAX5</i>   | 12                      | 0.00%                | 5 (15.60%)      | 7 (20.5%)          |
| <i>FLT3</i>   | 9                       | 1 (6.66%)            | 5 (15.60%)      | 3 (8.82%)          |
| <i>KRAS</i>   | 9                       | 3 (20%)              | 4 (12.5%)       | 2 (5.88%)          |
| <i>NRAS</i>   | 7                       | 3 (20%)              | 2 (6.25%)       | 2 (5.88%)          |
| <i>MLL2</i>   | 5                       | 1 (6.66%)            | 1 (3.12%)       | 3 (8.82%)          |
| <i>IL7R</i>   | 4                       | 0.00%                | 1 (3.12%)       | 4 (11.76%)         |
| <i>DNAH5</i>  | 4                       | 1 (6.66%)            | 2 (6.25%)       | 1 (2.94%)          |
| <i>ARID1A</i> | 4                       | 0.00%                | 2 (6.25%)       | 2 (5.88%)          |
| <i>JAK2</i>   | 4                       | 0.00%                | 2 (6.25%)       | 4 (11.76%)         |
| <i>CREBBP</i> | 4                       | 1 (6.66%)            | 1 (3.12%)       | 2 (5.88%)          |
| <i>ATM</i>    | 2                       | 0.00%                | 0.00%           | 2 (5.88%)          |
| <i>APC</i>    | 2                       | 1 (6.66%)            | 0.00%           | 1 (2.94%)          |
| <i>NOTCH1</i> | 2                       | 1 (6.66%)            | 1 (3.12%)       | 0.00%              |
| <i>EP300</i>  | 2                       | 0.00%                | 2 (6.25%)       | 0.00%              |
| <i>TP53</i>   | 2                       | 0.00%                | 0.00%           | 2 (5.88%)          |
| <i>CDKN2A</i> | 2                       | 0.00%                | 1 (3.12%)       | 1 (2.94%)          |
| <i>RUNX1</i>  | 1                       | 0.00%                | 1 (3.12%)       | 0.00%              |
| <i>JAK1</i>   | 1                       | 0.00%                | 0.00%           | 1 (2.94%)          |
| <i>NF1</i>    | 1                       | 0.00%                | 1 (3.12%)       | 0.00%              |

**Table S4.** Clinico-biologic features of the discovery panel.

| Code   | Age | Gender | Cohort   | Molecular biology | Lekemic blasts (%) | Source of germline DNA | Protocol       | Hb (g/dl) | Wbc (x10 <sup>9</sup> /L) | Plts (x10 <sup>9</sup> /L) |
|--------|-----|--------|----------|-------------------|--------------------|------------------------|----------------|-----------|---------------------------|----------------------------|
| ALL_1  | 2   | F      | Children | Negative          | 89                 | CR sample              | AIEOP LLA 2000 | 6.3       | 27.8                      | 46                         |
| ALL_2  | 3   | M      | Children | Negative          | 97                 | CR sample              | AIEOP LLA 2000 | 6.7       | 43.0                      | 24                         |
| ALL_3  | 3   | M      | Children | Negative          | 83                 | Saliva                 | AIEOP LLA 2000 | 7.1       | 48.1                      | 32                         |
| ALL_4  | 3.5 | F      | Children | Negative          | 90                 | CR sample              | AIEOP LLA 2000 | 7.7       | 42.8                      | 40                         |
| ALL_5  | 6   | F      | Children | Negative          | 87                 | Saliva                 | AIEOP LLA 2000 | 10.3      | 13.8                      | 12                         |
| ALL_6  | 16  | F      | AYA      | Negative          | 70                 | CR sample              | LAL2000        | 8.5       | 2.8                       | 95                         |
| ALL_7  | 16  | F      | AYA      | Negative          | 90                 | CR sample              | LAL0904        | 9.5       | 6.7                       | 34                         |
| ALL_8  | 19  | M      | AYA      | Negative          | 90                 | CR sample              | LAL0904        | 10.5      | 109                       | 9                          |
| ALL_9  | 24  | F      | AYA      | Negative          | 73                 | CR sample              | LAL0904        | 10.9      | 49                        | 115                        |
| ALL_10 | 27  | F      | AYA      | Negative          | 95                 | CR sample              | LAL0904        | 8         | 8                         | 10                         |
| ALL_11 | 47  | F      | Adult    | Negative          | 90                 | CR sample              | LAL0904        | 7.1       | 42                        | 6                          |
| ALL_13 | 53  | M      | Adult    | Negative          | 99                 | CR sample              | LAL0904        | 8.1       | 22.2                      | 18                         |
| ALL_14 | 57  | M      | Adult    | Negative          | 80                 | CR sample              | LAL0904        | 8.7       | 3.5                       | 29                         |

Abbreviations. CR, Complete remission.

**Table S5.** Characteristics of the B-NEG ALL patients included in screening panels 1 and 2.

| <b>Screening panel 1</b> | <b>Cohort</b> | <b>Total N</b> | <b>Gender (M/F)</b> | <b>Hb average (g/dl)</b> | <b>WBC average (<math>\times 10^9/L</math>)</b> | <b>Plts average (<math>\times 10^9/L</math>)</b> |
|--------------------------|---------------|----------------|---------------------|--------------------------|-------------------------------------------------|--------------------------------------------------|
|                          | Children      | 10             | 45/23               | 8.8 (4-14.3)             | 58.7 (1.28-357)                                 | 75.8 (5-394)                                     |
|                          | AYA           | 27             |                     |                          |                                                 |                                                  |
|                          | Adults        | 31             |                     |                          |                                                 |                                                  |
| <b>Screening panel 2</b> | Children      | 35             | 54/34               | 16.7 (1.2-15.8)          | 25.7 (0.6-425)                                  | 62.4 (0.23-584)                                  |
|                          | AYA           | 29             |                     |                          |                                                 |                                                  |
|                          | Adults        | 23             |                     |                          |                                                 |                                                  |

Abbreviations. Hb, hemoglobin; WBC, white blood cell count; Plts, platelets count.

**Table S6.** List of adult and pediatric clinical trials.

| <b>Protocol ID</b> | <b>N of cases</b> | <b>NCT number</b> | <b>Protocol description</b>             |
|--------------------|-------------------|-------------------|-----------------------------------------|
| GIMEMA LAL2000     | 20                | NCT00537550       | Standard regimen for adult ALL          |
| GIMEMA LAL0904     | 56                | NCT00458848       | Standard regimen for adult ALL          |
| GIMEMA LAL1104     | 8                 | NCT00475280       | Age-adjusted (elderly) standard therapy |
| GIMEMA LAL1308     | 11                | NCT01156883       | BFM-like therapeutic regimen            |
| AIEOP LLA 2000     | 45                | NCT00613457       | BFM-based protocol                      |
| AIEOP-BFM ALL 2009 | 10                | NCT01117441       | BFM-based protocol                      |

**Table S7.** Illumina sequencing summary.

| Sample ID | Target region coverage (%) |        | Mean depth <sup>^</sup> | N of mapped reads (%) |
|-----------|----------------------------|--------|-------------------------|-----------------------|
|           | ≥10X                       | ≥30X   |                         |                       |
| ALL_1_T   | 87.09%                     | 65.77% | 56.42                   | 98.88%                |
| ALL_1_N   | 86.68%                     | 63.23% | 49.31                   | 98.82%                |
| ALL_2_T   | 87.89%                     | 68.45% | 57.95                   | 98.78%                |
| ALL_2_N   | 86.34%                     | 62.33% | 48.47                   | 98.83%                |
| ALL_3_T   | 86.85%                     | 64.79% | 52.97                   | 98.86%                |
| ALL_3_N   | 89.16%                     | 72.97% | 66.27                   | 98.88%                |
| ALL_4_T   | 84.09%                     | 55.35% | 43.24                   | 98.88%                |
| ALL_4_N   | 87.33%                     | 69.46% | 58.30                   | 98.86%                |
| ALL_5_T   | 88.80%                     | 73.70% | 69.37                   | 98.85%                |
| ALL_5_N   | 88.43%                     | 69.24% | 58.43                   | 98.71%                |
| ALL_6_T   | 89.31%                     | 75.72% | 72.16                   | 98.88%                |
| ALL_6_N   | 89.42%                     | 76.31% | 73.13                   | 98.85%                |
| ALL_7_T   | 87.14%                     | 67.78% | 56.47                   | 98.79%                |
| ALL_7_N   | 87.66%                     | 68.67% | 56.84                   | 98.85%                |
| ALL_8_T   | 89.10%                     | 75.89% | 74.60                   | 98.74%                |
| ALL_8_N   | 89.95%                     | 78.34% | 81.05                   | 98.76%                |
| ALL_9_T   | 85.14%                     | 59.91% | 45.74                   | 98.79%                |
| ALL_9_N   | 89.06%                     | 73.65% | 67.05                   | 98.84%                |
| ALL_10_T  | 87.40%                     | 68.83% | 57.67                   | 98.73%                |
| ALL_10_N  | 87.58%                     | 68.92% | 57.31                   | 98.69%                |
| ALL_11_T  | 87.01%                     | 66.62% | 54.53                   | 98.68%                |
| ALL_11_N  | 89.82%                     | 79.14% | 87.46                   | 98.70%                |
| ALL_13_T  | 88.07%                     | 71.57% | 62.89                   | 98.78%                |
| ALL_13_N  | 84.51%                     | 55.30% | 41.24                   | 98.79%                |
| ALL_14_T  | 88.55%                     | 72.74% | 66.04                   | 98.76%                |
| ALL_14_N  | 86.92%                     | 66.75% | 54.18                   | 98.75%                |

<sup>^</sup>Mean number of sequence reads covering the target exome  
Abbreviations: T, tumor DNA sample; N, germline DNA.



**Table S8.** Number of reads in CDS regions of selected driver genes in the screening panel 1.

| Sample ID  | <i>PAX5</i> | <i>FLT3</i> | <i>KRAS</i> | <i>NRAS</i> | <i>MLL2</i> | <i>IL7R</i> | <i>DNAH5</i> | <i>ARID1A</i> | <i>JAK2</i> |
|------------|-------------|-------------|-------------|-------------|-------------|-------------|--------------|---------------|-------------|
| GQW-180    | 5902        | 2509        | 739         | 436         | 17033       | 1715        | 10827        | 11531         | 1108        |
| GQW-181    | 11606       | 3025        | 751         | 860         | 19523       | 1862        | 11521        | 13447         | 2319        |
| GQW-182    | 12370       | 3129        | 884         | 716         | 20044       | 2155        | 11510        | 14392         | 2637        |
| GQW-184    | 8218        | 2293        | 702         | 630         | 15220       | 858         | 6610         | 11302         | 2240        |
| GQW-185    | 9547        | 2834        | 689         | 714         | 17931       | 1765        | 10621        | 12396         | 2299        |
| GQW-186    | 7697        | 2304        | 681         | 552         | 14065       | 1371        | 8509         | 10093         | 1794        |
| GQW-187    | 7573        | 1010        | 332         | 620         | 13887       | 207         | 1993         | 7666          | 1175        |
| GQW-188    | 13508       | 3482        | 1003        | 1015        | 20799       | 2180        | 14500        | 14951         | 3151        |
| GQW-189    | 11348       | 2802        | 867         | 736         | 18213       | 1828        | 11491        | 13029         | 2301        |
| GQW-190    | 9091        | 2388        | 712         | 677         | 14489       | 1629        | 10153        | 9973          | 2232        |
| GQW-191    | 3654        | 1857        | 551         | 388         | 14114       | 1236        | 7253         | 9754          | 1600        |
| GQW-192    | 13767       | 3428        | 839         | 822         | 23682       | 2116        | 12773        | 16122         | 2504        |
| GQW-193    | 9458        | 2554        | 733         | 647         | 15805       | 1691        | 10113        | 11428         | 2132        |
| GQW-194    | 11038       | 2883        | 890         | 792         | 20388       | 2051        | 11816        | 13757         | 2560        |
| GQW-195    | 5382        | 4129        | 1066        | 1117        | 26935       | 2691        | 15790        | 18901         | 3393        |
| GQW-196    | 8493        | 3922        | 1142        | 958         | 26336       | 2397        | 14373        | 17800         | 1459        |
| GQW-197    | 15021       | 3634        | 894         | 861         | 23425       | 2336        | 13435        | 16926         | 2756        |
| GQW-198    | 19840       | 1570        | 793         | 416         | 13130       | 1043        | 6737         | 10134         | 1278        |
| GQW-199    | 7668        | 3342        | 676         | 868         | 21506       | 2167        | 12333        | 15708         | 1144        |
| GQW-200    | 9997        | 3034        | 861         | 766         | 19884       | 1555        | 10351        | 13983         | 2253        |
| GQW-202    | 17710       | 4293        | 1130        | 1153        | 30711       | 2885        | 17325        | 17551         | 3546        |
| GQW-204    | 10629       | 1989        | 749         | 523         | 21658       | 1108        | 6800         | 13380         | 2324        |
| GQW-205    | 18829       | 4231        | 759         | 1125        | 31546       | 2707        | 16334        | 21507         | 3094        |
| GQW-206    | 11972       | 2753        | 754         | 708         | 26211       | 1516        | 10017        | 17506         | 2862        |
| GQW-208    | 7601        | 2281        | 770         | 521         | 20695       | 1471        | 9226         | 13309         | 2249        |
| GQW-209    | 9054        | 1876        | 526         | 509         | 17415       | 1356        | 8662         | 11313         | 1503        |
| GQW-210    | 11176       | 2710        | 960         | 1254        | 41260       | 612         | 5091         | 23454         | 2485        |
| GQW-211    | 9701        | 2451        | 715         | 652         | 14758       | 1653        | 9592         | 6109          | 2210        |
| GQW-212    | 10307       | 3148        | 1218        | 712         | 19865       | 1667        | 11028        | 12853         | 3083        |
| GQW-213    | 12789       | 1878        | 876         | 543         | 20104       | 837         | 6029         | 12156         | 2896        |
| GQW-214    | 5377        | 3032        | 867         | 749         | 18194       | 1665        | 11831        | 12598         | 1243        |
| GQW-215    | 7122        | 2254        | 1038        | 555         | 11780       | 1193        | 7150         | 9210          | 3078        |
| GQW-216    | 23145       | 4741        | 1227        | 1392        | 47987       | 1668        | 13689        | 30452         | 3651        |
| GQW-218    | 11865       | 3213        | 857         | 765         | 19131       | 1944        | 12105        | 13861         | 2425        |
| GQW-219    | 4186        | 629         | 258         | 372         | 10792       | 272         | 1742         | 5322          | 873         |
| GQW-221    | 5581        | 2697        | 701         | 685         | 14771       | 1740        | 10669        | 11236         | 1721        |
| GQW-223    | 4909        | 2142        | 739         | 507         | 13050       | 1261        | 8468         | 9245          | 1907        |
| GQW-224    | 4936        | 2883        | 945         | 768         | 16664       | 1619        | 11140        | 12115         | 2417        |
| GQW-225    | 4798        | 2548        | 832         | 699         | 15047       | 1870        | 10437        | 10457         | 2368        |
| GQW-226    | 6241        | 2293        | 615         | 444         | 14691       | 1449        | 8883         | 7960          | 1533        |
| GQW-227    | 10606       | 2416        | 750         | 699         | 17418       | 1493        | 9820         | 12670         | 1883        |
| GQW-228    | 11809       | 3021        | 812         | 808         | 21215       | 1875        | 11947        | 15267         | 2064        |
| GQW-232    | 6442        | 1837        | 470         | 473         | 12402       | 1244        | 7276         | 8565          | 1488        |
| GQW-233    | 13726       | 3575        | 1015        | 960         | 21326       | 2228        | 13734        | 15134         | 3041        |
| GQW-234    | 10985       | 3033        | 1377        | 1333        | 29901       | 2840        | 18634        | 20984         | 2335        |
| GQW-235    | 10897       | 2657        | 662         | 799         | 17462       | 1923        | 9944         | 12222         | 2003        |
| GQW-236    | 12253       | 3281        | 959         | 862         | 23527       | 2018        | 13224        | 16096         | 2729        |
| GQW-238    | 11509       | 3128        | 870         | 783         | 20066       | 1892        | 12311        | 13541         | 2419        |
| GQW-239    | 8113        | 2206        | 611         | 540         | 14768       | 1373        | 8657         | 10633         | 1107        |
| GQW-240    | 16535       | 4245        | 1160        | 1059        | 28982       | 2823        | 16718        | 19987         | 3222        |
| GQW-241    | 12540       | 2879        | 671         | 752         | 20061       | 1821        | 11211        | 14166         | 2166        |
| GQW-242    | 10194       | 3065        | 768         | 745         | 19571       | 1852        | 11360        | 13705         | 2368        |
| GQW-246    | 12289       | 3339        | 952         | 836         | 20265       | 2010        | 12535        | 14266         | 2558        |
| GQW-247    | 16432       | 4549        | 1299        | 1393        | 27991       | 2937        | 19148        | 20637         | 3873        |
| GQW-248    | 5556        | 1842        | 486         | 470         | 11548       | 1130        | 7263         | 8300          | 1478        |
| GQW-254    | 12944       | 3617        | 901         | 860         | 22813       | 2272        | 13906        | 16060         | 2706        |
| GQW-255    | 6792        | 2097        | 592         | 578         | 14995       | 1439        | 8512         | 10305         | 1787        |
| GQW-183    | 10110       | 3993        | 983         | 1049        | 25602       | 2453        | 14834        | 18900         | 2808        |
| GQW-220    | 17048       | 2796        | 1613        | 1631        | 31592       | 1537        | 10979        | 16459         | 4699        |
| GQW-222    | 10444       | 2587        | 638         | 678         | 18062       | 1701        | 10497        | 13058         | 2170        |
| GQW-229    | 6219        | 2424        | 1347        | 440         | 16632       | 1285        | 6877         | 10008         | 4453        |
| GQW-230    | 10899       | 2891        | 833         | 754         | 18674       | 1828        | 11092        | 13813         | 2275        |
| GQW-231    | 8495        | 2635        | 1457        | 443         | 13842       | 1349        | 8516         | 11242         | 4575        |
| GQW-237    | 10136       | 2286        | 794         | 610         | 16965       | 1378        | 8978         | 11620         | 2019        |
| GQW-243    | 3864        | 2312        | 1029        | 400         | 12356       | 1110        | 6991         | 8728          | 3066        |
| GQW-245    | 6977        | 2338        | 953         | 645         | 14844       | 1361        | 8323         | 10597         | 2853        |
| GQW-249    | 7212        | 2202        | 672         | 541         | 14983       | 1230        | 6937         | 10543         | 2171        |
| GQW-250    | 6343        | 1364        | 572         | 606         | 13929       | 1369        | 7952         | 9355          | 2056        |
| CDS_length | 10677       | 3006        | 1145        | 574         | 16668       | 1388        | 13954        | 13105         | 3422        |

| Sample ID  | CREBBP | ATM   | APC   | NOTCH1 | EP300 | TP53 | CDKN2A | RUNX1 | JAK1 | NF1   |
|------------|--------|-------|-------|--------|-------|------|--------|-------|------|-------|
| GQW-180    | 10753  | 6256  | 6818  | 6760   | 9379  | 2119 | 111    | 1639  | 2719 | 17766 |
| GQW-181    | 11808  | 6895  | 7275  | 5467   | 10465 | 2732 | 1683   | 2126  | 3112 | 13611 |
| GQW-182    | 12418  | 7463  | 7726  | 7829   | 11652 | 3172 | 54     | 2261  | 3365 | 22090 |
| GQW-184    | 5261   | 4728  | 2878  | 5697   | 8317  | 2354 | 2028   | 1629  | 2300 | 8499  |
| GQW-185    | 11251  | 6442  | 7148  | 4974   | 9759  | 2412 | 1484   | 1905  | 2873 | 12478 |
| GQW-186    | 8519   | 2938  | 6029  | 3839   | 7683  | 2082 | 140    | 1640  | 2221 | 10017 |
| GQW-187    | 10580  | 1694  | 1001  | 6424   | 4679  | 1911 | 1805   | 1459  | 1136 | 4094  |
| GQW-188    | 13030  | 9037  | 9490  | 5434   | 12043 | 3077 | 2021   | 2067  | 3663 | 16441 |
| GQW-189    | 11162  | 6741  | 7534  | 4835   | 9713  | 2763 | 1780   | 1890  | 3080 | 13082 |
| GQW-190    | 9282   | 9285  | 6414  | 3527   | 11960 | 2345 | 1363   | 1962  | 2645 | 12037 |
| GQW-191    | 8381   | 4277  | 5415  | 3697   | 7294  | 1973 | 1225   | 1173  | 1870 | 9005  |
| GQW-192    | 14075  | 7756  | 8815  | 6649   | 12986 | 3358 | 111    | 2271  | 3431 | 15420 |
| GQW-193    | 9815   | 6105  | 6792  | 4474   | 8967  | 2259 | 1436   | 1384  | 2627 | 11228 |
| GQW-194    | 11853  | 6728  | 8307  | 5311   | 10776 | 3197 | 1767   | 1963  | 2950 | 14076 |
| GQW-195    | 16320  | 9869  | 10860 | 7151   | 14360 | 3792 | 38     | 2689  | 3918 | 19653 |
| GQW-196    | 15364  | 8731  | 10558 | 7129   | 13932 | 3618 | 180    | 2699  | 3729 | 17510 |
| GQW-197    | 14192  | 8214  | 8765  | 6201   | 12658 | 3352 | 1588   | 2150  | 3567 | 15997 |
| GQW-198    | 7421   | 3930  | 3872  | 4733   | 6029  | 1585 | 172    | 1396  | 1531 | 8918  |
| GQW-199    | 13053  | 6866  | 9014  | 5475   | 11831 | 3087 | 307    | 2990  | 3306 | 13038 |
| GQW-200    | 12088  | 6779  | 6199  | 5267   | 10585 | 3480 | 1681   | 2006  | 2851 | 12626 |
| GQW-202    | 18319  | 9804  | 11141 | 8364   | 15910 | 4399 | 2619   | 2801  | 4542 | 19691 |
| GQW-204    | 12361  | 4640  | 4465  | 7324   | 8700  | 2469 | 1577   | 2515  | 1986 | 9187  |
| GQW-205    | 18055  | 9719  | 10829 | 8981   | 16683 | 4487 | 67     | 2901  | 4566 | 19106 |
| GQW-206    | 14338  | 5752  | 5670  | 8668   | 10682 | 3416 | 1960   | 3143  | 2866 | 12112 |
| GQW-208    | 10339  | 5209  | 5890  | 5919   | 9113  | 2637 | 1607   | 2124  | 2466 | 10268 |
| GQW-209    | 10625  | 3669  | 5481  | 6563   | 7007  | 3157 | 1664   | 4818  | 1742 | 11499 |
| GQW-210    | 25369  | 4145  | 3988  | 13406  | 15276 | 5637 | 2602   | 4440  | 2743 | 10832 |
| GQW-211    | 10003  | 5875  | 6338  | 4091   | 8598  | 2385 | 1542   | 1530  | 2669 | 11555 |
| GQW-212    | 11273  | 7940  | 7117  | 4189   | 10620 | 4214 | 1122   | 2675  | 2614 | 22725 |
| GQW-213    | 10013  | 3784  | 3612  | 7265   | 7544  | 2049 | 2297   | 3067  | 1902 | 9380  |
| GQW-214    | 11380  | 7259  | 7700  | 4848   | 10721 | 2866 | 905    | 1793  | 2995 | 14374 |
| GQW-215    | 6548   | 6951  | 4563  | 5035   | 5953  | 1705 | 1518   | 3495  | 1421 | 15902 |
| GQW-216    | 29108  | 9285  | 7879  | 15285  | 21200 | 6698 | 541    | 3988  | 4290 | 19192 |
| GQW-218    | 11797  | 7312  | 7682  | 5291   | 10862 | 2735 | 160    | 1991  | 3018 | 13976 |
| GQW-219    | 6166   | 1437  | 1327  | 4159   | 2792  | 333  | 1245   | 1744  | 708  | 3417  |
| GQW-221    | 10177  | 5926  | 7110  | 3704   | 9591  | 2367 | 1091   | 1265  | 2587 | 11802 |
| GQW-223    | 8372   | 5269  | 6060  | 3161   | 7787  | 2018 | 1266   | 1265  | 2198 | 10150 |
| GQW-224    | 10482  | 6985  | 7723  | 4436   | 9570  | 2540 | 63     | 1762  | 2882 | 13469 |
| GQW-225    | 9986   | 6886  | 6900  | 3797   | 8824  | 2334 | 77     | 1806  | 2624 | 12249 |
| GQW-226    | 6965   | 3981  | 6364  | 2915   | 8032  | 2353 | 813    | 1555  | 1582 | 10778 |
| GQW-227    | 10226  | 5744  | 6341  | 4999   | 9566  | 2385 | 1819   | 1658  | 2523 | 11887 |
| GQW-228    | 12599  | 6416  | 7604  | 6470   | 11244 | 2849 | 1908   | 1993  | 3283 | 13001 |
| GQW-232    | 6992   | 14201 | 3007  | 3169   | 6586  | 1718 | 1142   | 1221  | 1870 | 9015  |
| GQW-233    | 13374  | 8685  | 9418  | 5663   | 12179 | 3150 | 1947   | 2339  | 3548 | 16786 |
| GQW-234    | 19156  | 11297 | 12290 | 5125   | 16477 | 4784 | 434    | 3192  | 4934 | 21878 |
| GQW-235    | 10698  | 6412  | 6714  | 5094   | 9350  | 2880 | 1590   | 1790  | 2967 | 12110 |
| GQW-236    | 13475  | 8203  | 9667  | 6193   | 11707 | 3118 | 1944   | 2434  | 3421 | 15970 |
| GQW-238    | 11991  | 7485  | 8050  | 5048   | 10434 | 2777 | 1620   | 6287  | 3067 | 14663 |
| GQW-239    | 8369   | 5446  | 6357  | 3875   | 8036  | 2168 | 246    | 1558  | 2127 | 10497 |
| GQW-240    | 17388  | 10149 | 11483 | 7823   | 16414 | 3964 | 2428   | 2686  | 4164 | 19394 |
| GQW-241    | 12352  | 6201  | 7353  | 5693   | 10705 | 3088 | 506    | 2263  | 2907 | 13374 |
| GQW-242    | 11478  | 7141  | 8335  | 5054   | 10914 | 3132 | 1616   | 1578  | 2891 | 14118 |
| GQW-246    | 12605  | 7558  | 8437  | 5455   | 11209 | 2938 | 1948   | 2130  | 3446 | 14364 |
| GQW-247    | 17051  | 11946 | 12706 | 6487   | 16571 | 4348 | 2540   | 3189  | 4468 | 22527 |
| GQW-248    | 6857   | 4435  | 5423  | 2922   | 6406  | 1749 | 1009   | 1106  | 1709 | 8408  |
| GQW-254    | 14213  | 8061  | 9164  | 6302   | 12549 | 3356 | 2175   | 2374  | 3461 | 16019 |
| GQW-255    | 8690   | 5253  | 6011  | 3776   | 7769  | 2054 | 233    | 1418  | 2243 | 10261 |
| GQW-183    | 16073  | 8867  | 9706  | 7099   | 13968 | 3991 | 102    | 2726  | 3853 | 16479 |
| GQW-220    | 20622  | 6578  | 5662  | 15687  | 9715  | 2440 | 6161   | 3637  | 2254 | 17696 |
| GQW-222    | 10954  | 6598  | 6923  | 5161   | 9895  | 2610 | 1105   | 1793  | 2748 | 12452 |
| GQW-229    | 6618   | 5486  | 4750  | 3238   | 6811  | 1276 | 776    | 1834  | 1367 | 12867 |
| GQW-230    | 11937  | 6960  | 7153  | 5019   | 10019 | 3006 | 1640   | 2023  | 2912 | 13407 |
| GQW-231    | 6140   | 6543  | 5091  | 4129   | 6455  | 1433 | 1203   | 1781  | 1392 | 13984 |
| GQW-237    | 9913   | 5932  | 5427  | 4520   | 8849  | 2510 | 1467   | 1688  | 2437 | 11239 |
| GQW-243    | 5810   | 5617  | 4636  | 2661   | 5561  | 941  | 325    | 1563  | 1441 | 11693 |
| GQW-245    | 7914   | 5104  | 5656  | 3039   | 7788  | 1942 | 405    | 806   | 1990 | 12804 |
| GQW-249    | 8336   | 4592  | 5231  | 3256   | 7076  | 1740 | 879    | 2391  | 2115 | 10807 |
| GQW-250    | 8013   | 5571  | 5262  | 2851   | 7158  | 1102 | 595    | 1069  | 1955 | 11254 |
| CDS_length | 14605  | 9233  | 8547  | 7702   | 7276  | 3277 | 1382   | 3577  | 3489 | 18889 |

**Table S9.** Detail of primers including key (A) and MIDs (B) used to perform NGS of *JAK2*, *IL7R*, *CRLF2*, *PAX5*.

**A**

| Primer name | Primer sequence                                             |
|-------------|-------------------------------------------------------------|
| JAK2_E12_F  | CGTATCGCCTCCCTCGCGCCATCAGACGAGTGCCTCTTTGGAGCAATTCATAC       |
| JAK2_E13_F  | CGTATCGCCTCCCTCGCGCCATCAGACGAGTGCCTCTTCCATCTTTACTCATTCTTT   |
| JAK2_E14_F  | CGTATCGCCTCCCTCGCGCCATCAGACGAGTGCCTTATGGACAACAGTCAAACAACAA  |
| JAK2_E15_F  | CGTATCGCCTCCCTCGCGCCATCAGACGAGTGCCTAAAGTTGTGAGTTTTGCCAAT    |
| JAK2_E16_F  | CGTATCGCCTCCCTCGCGCCATCAGACGAGTGCCTCAATGCATGCCTCCAA         |
| IL7R_E06_F  | CGTATCGCCTCCCTCGCGCCATCAGACGAGTGCCTTGCATGGCTACTGAATGCTC     |
| CRLF2_E06_F | CGTATCGCCTCCCTCGCGCCATCAGACGAGTGCCTCGCACGTCATGTTGAAAAT      |
| PAX5_E02_F  | CGTATCGCCTCCCTCGCGCCATCAGACGAGTGCCTGGGGCTCTGGGTCTCAC        |
| PAX5_E03_F  | CGTATCGCCTCCCTCGCGCCATCAGACGAGTGCCTTTCCTGGCCAGAGTAGCCCGT    |
| JAK2_E12_R  | CTATGCGCCTTGCCAGCCCCTCAGACGAGTGCCTTGGCTAACATCTAACACAAGGT    |
| JAK2_E13_R  | CTATGCGCCTTGCCAGCCCCTCAGACGAGTGCCTCCACAAGAATGTATCCTCAGA     |
| JAK2_E14_R  | CTATGCGCCTTGCCAGCCCCTCAGACGAGTGCCTTGTGGGCATTGTAACCTTC       |
| JAK2_E15_R  | CTATGCGCCTTGCCAGCCCCTCAGACGAGTGCCTCACCTAACACAGACTATTTTACATG |
| JAK2_E16_R  | CTATGCGCCTTGCCAGCCCCTCAGACGAGTGCCTACAACATGCCCTTTACACC       |
| IL7R_E06_R  | CTATGCGCCTTGCCAGCCCCTCAGACGAGTGCCTGGACAGCGTTTGCCTAATGT      |
| CRLF2_E06_R | CTATGCGCCTTGCCAGCCCCTCAGACGAGTGCCTCCATCATAAGAGTGGGCATTG     |
| PAX5_E02_R  | CTATGCGCCTTGCCAGCCCCTCAGACGAGTGCCTTCAAGGGAAGCCTCGAGCT       |
| PAX5_E03_R  | CTATGCGCCTTGCCAGCCCCTCAGACGAGTGCCTCCCAACCCCCACAGGCACGA      |

**B**

| MID name      | MID sequence |
|---------------|--------------|
| <b>MID 1</b>  | ACGAGTGCCT   |
| <b>MID 2</b>  | ACGCTCGACA   |
| <b>MID 3</b>  | AGACGCACTC   |
| <b>MID 4</b>  | AGCACTGTAG   |
| <b>MID 5</b>  | ATCAGACACG   |
| <b>MID 6</b>  | ATATCGCGAG   |
| <b>MID 8</b>  | CTCGCGTGTC   |
| <b>MID 10</b> | TCTCTATGCG   |

**Figure S1. PAX5 mutations in B-NEG ALL. A) Distribution and features of PAX5 mutations. B) Incidence of PAX5 mutations. C) Incidence of PAX5 lesions.**

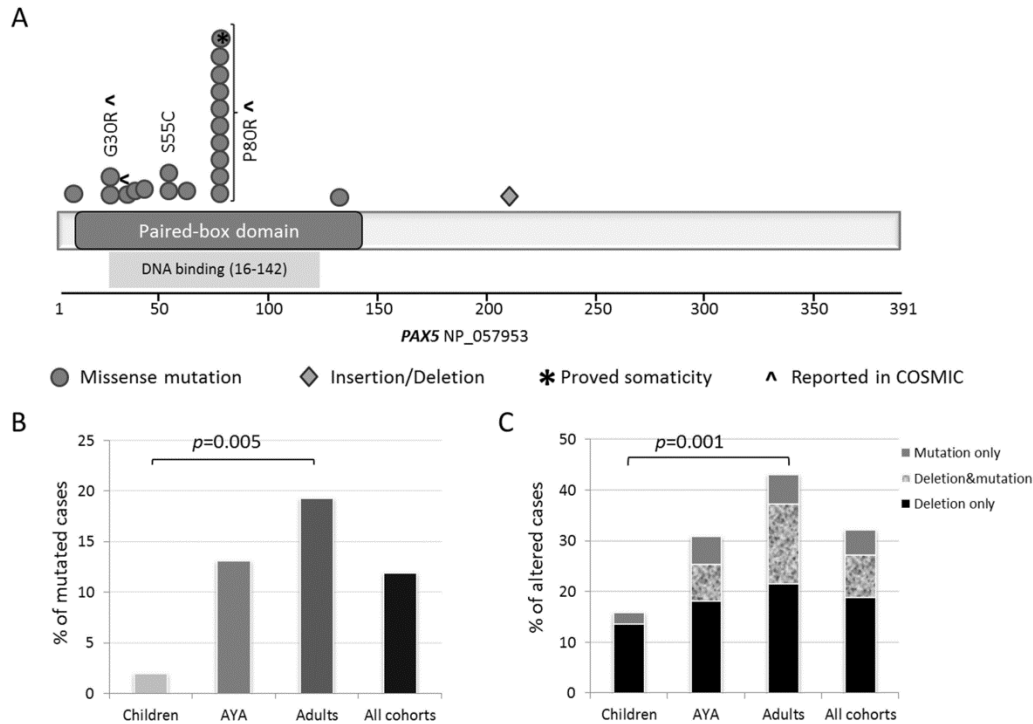

**Figure S2. FLT3 mutations in B-NEG ALLs. A) Type of FLT3 mutations and frequency of FLT3 mutations across age cohorts. B) Distribution and features of FLT3 mutations.**

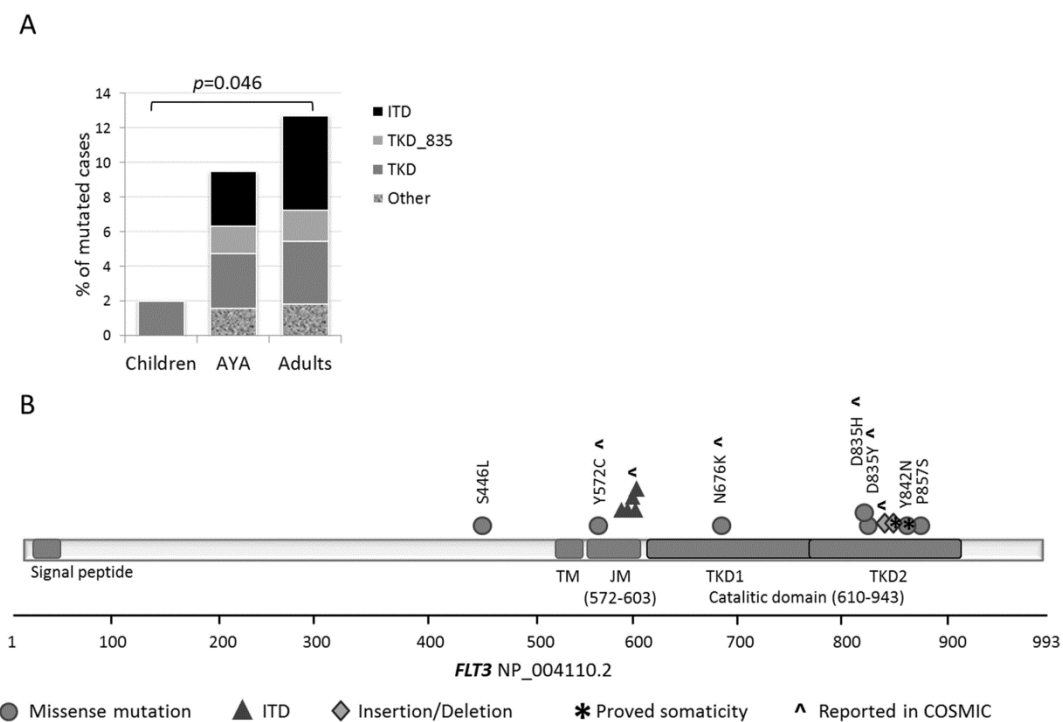



**Figure S5. Experimental strategy.**

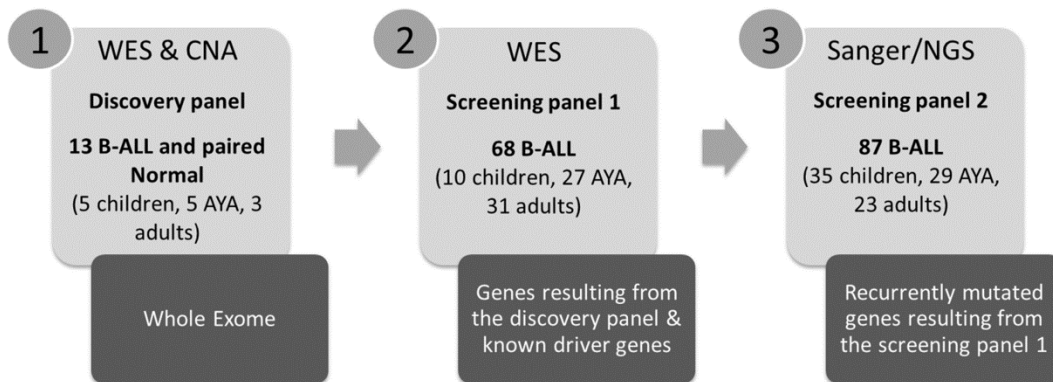

Supplement: oncotarget-07-13886-s001.pdf [file oncotarget-07-13886-s001.pdf]
